# Supplementary material for: C-Branched chiral (racemic) macrocyclic amino acids: structure of their Ni(ii), Zn(ii) and Cu(ii) complexes
Source: Royal Society of Chemistry journal article supplement (doi:10.1039/c1dt10539f), 2011-01-01

### <sup>1</sup>H-NMR OF COMPOUND 11

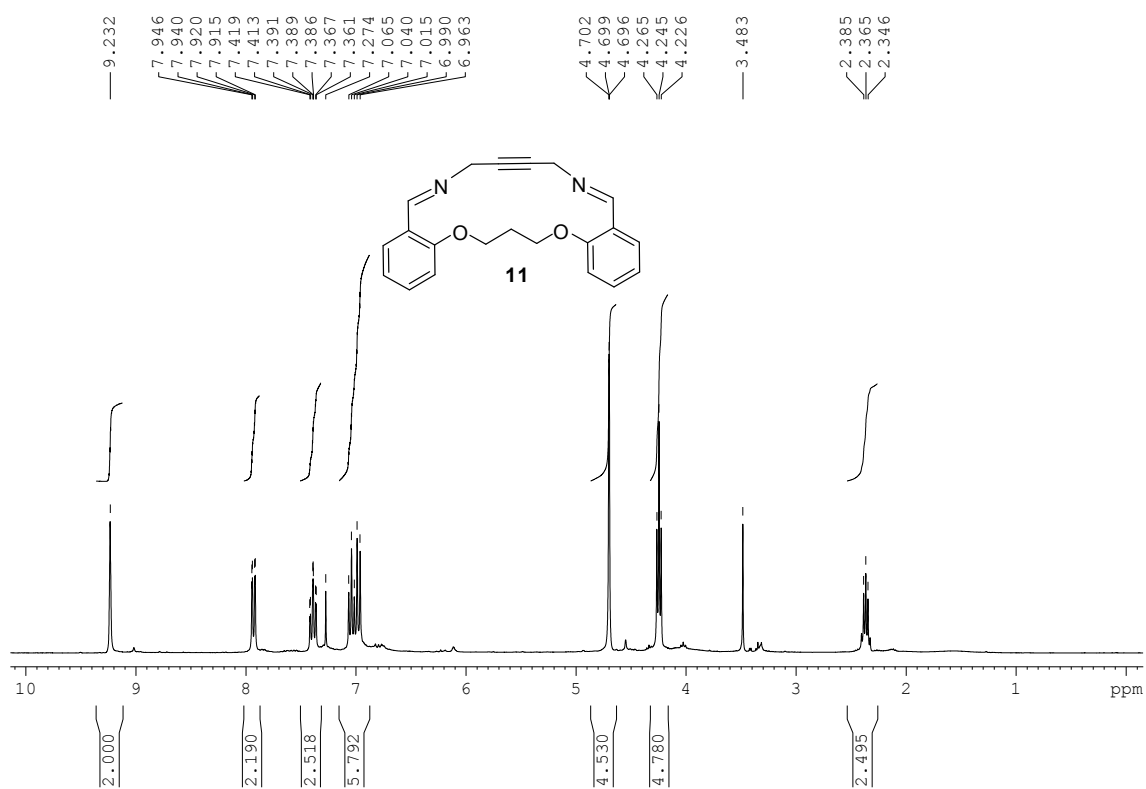

### <sup>13</sup>C-NMR OF COMPOUND 11

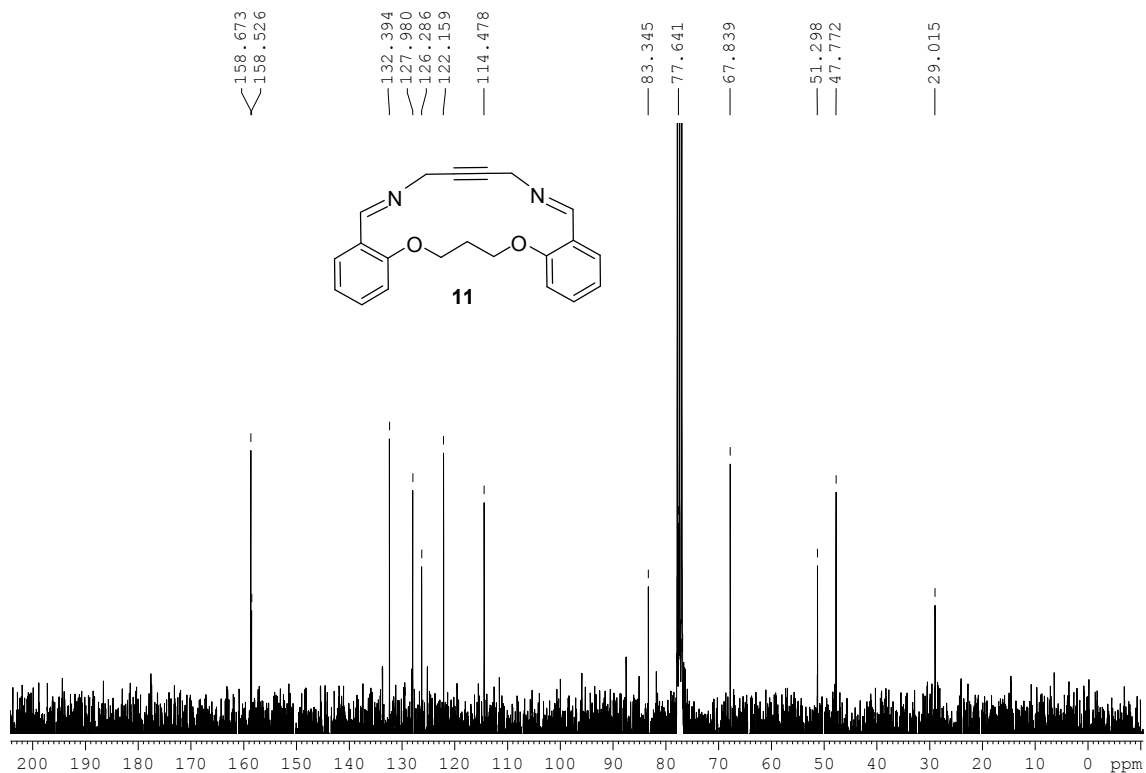

### <sup>1</sup>H-NMR OF COMPOUND 12

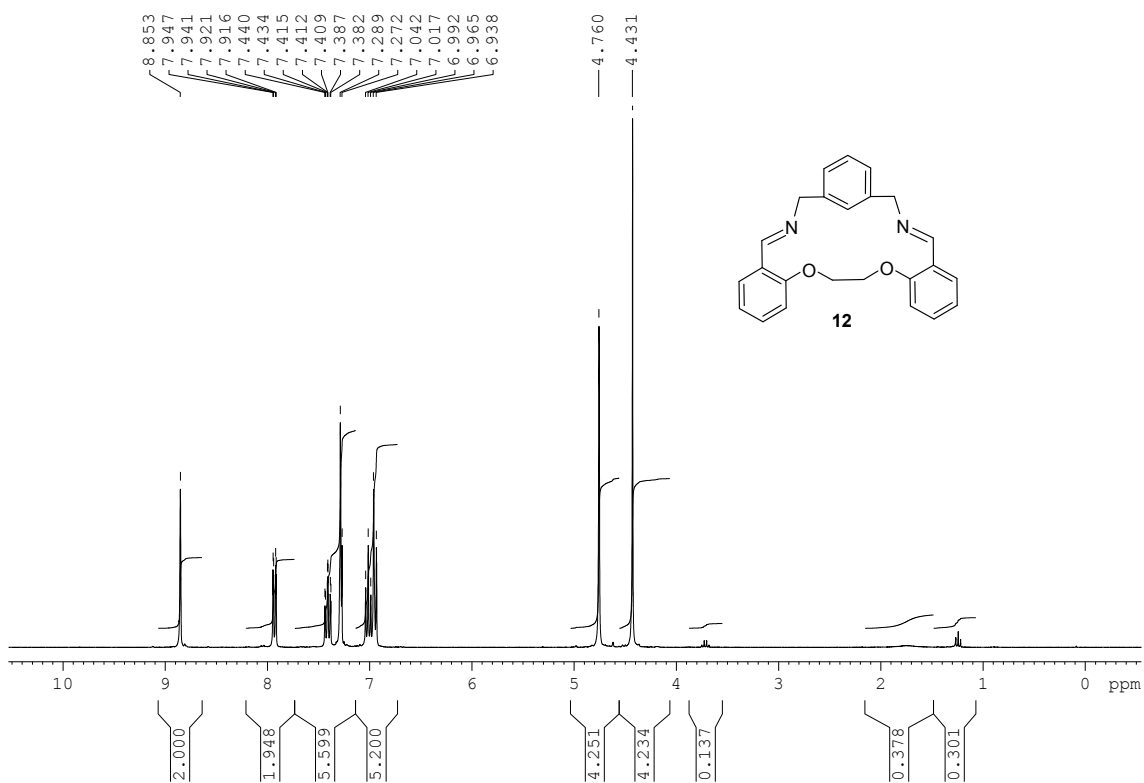

### <sup>13</sup>C-NMR OF COMPOUND 12

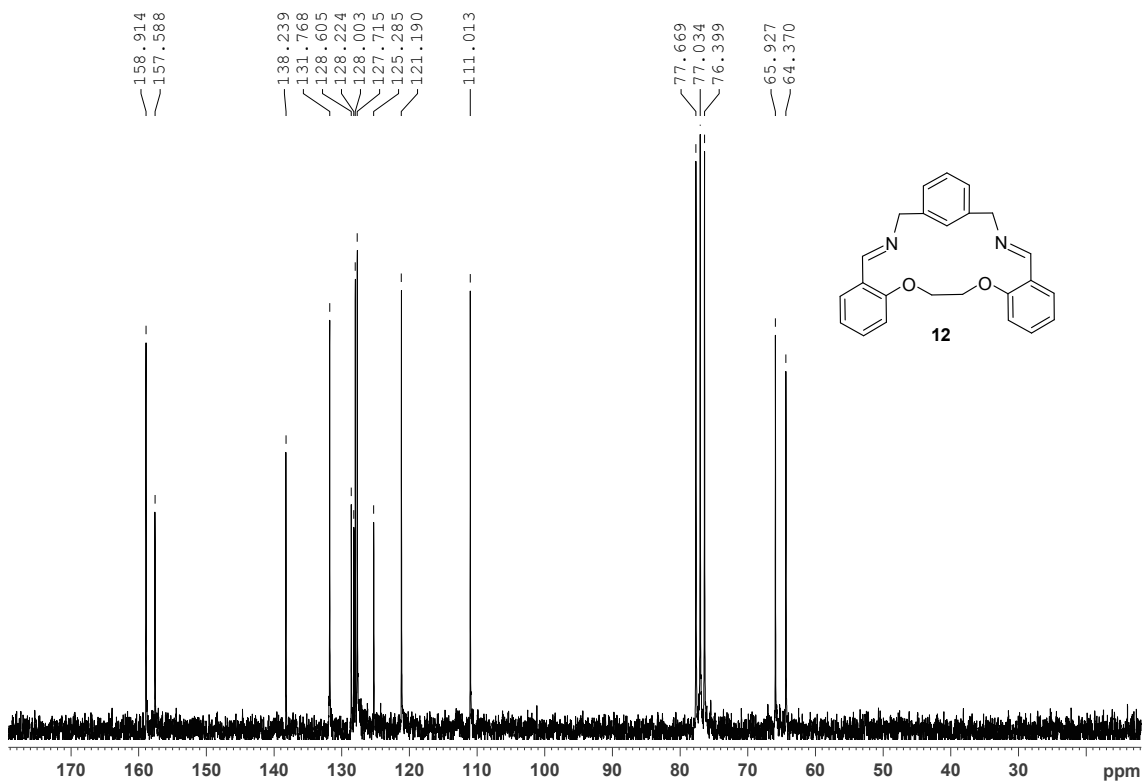

### <sup>1</sup>H-NMR OF COMPOUND 13

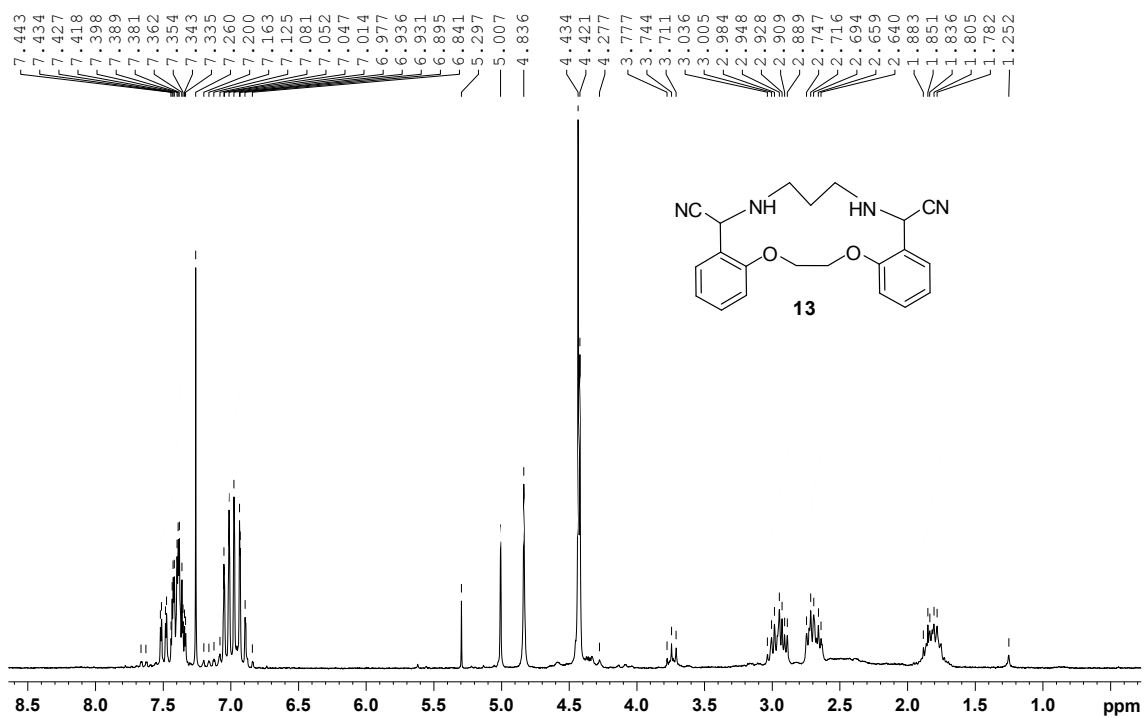

### <sup>13</sup>C-NMR OF COMPOUND 13

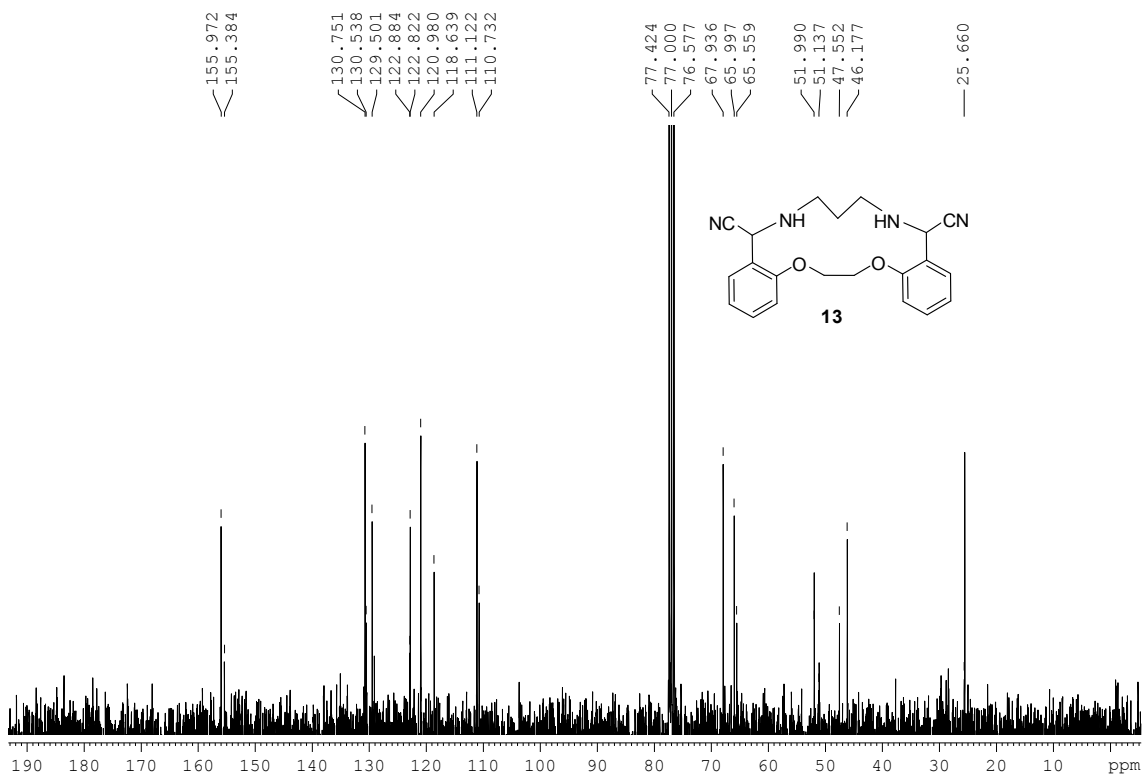

### <sup>1</sup>H-NMR OF COMPOUND 14

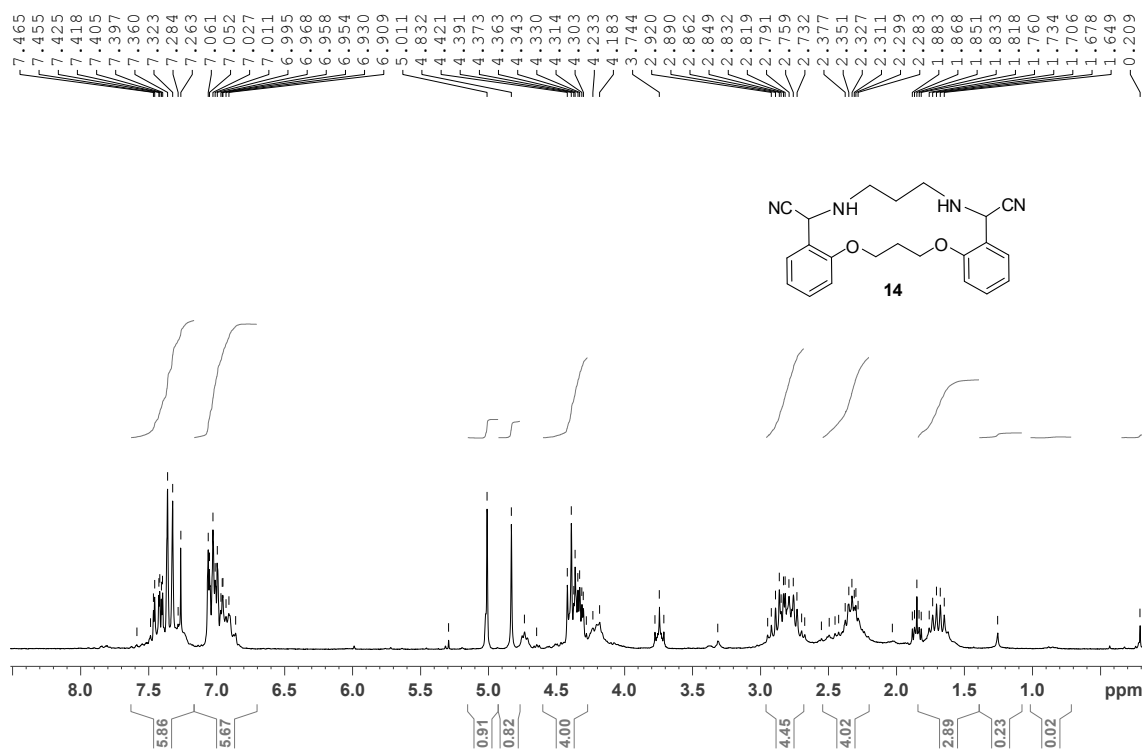

### <sup>13</sup>C-NMR OF COMPOUND 14

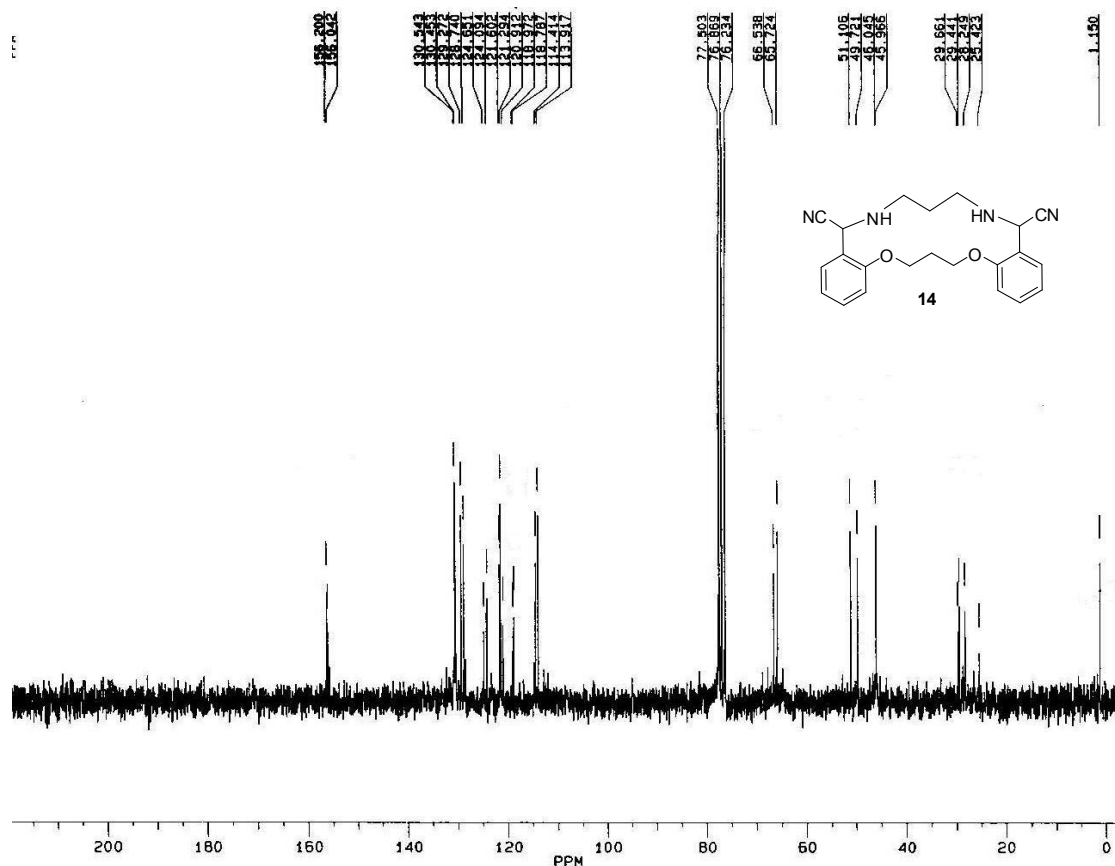

### <sup>1</sup>H-NMR OF COMPOUND 15

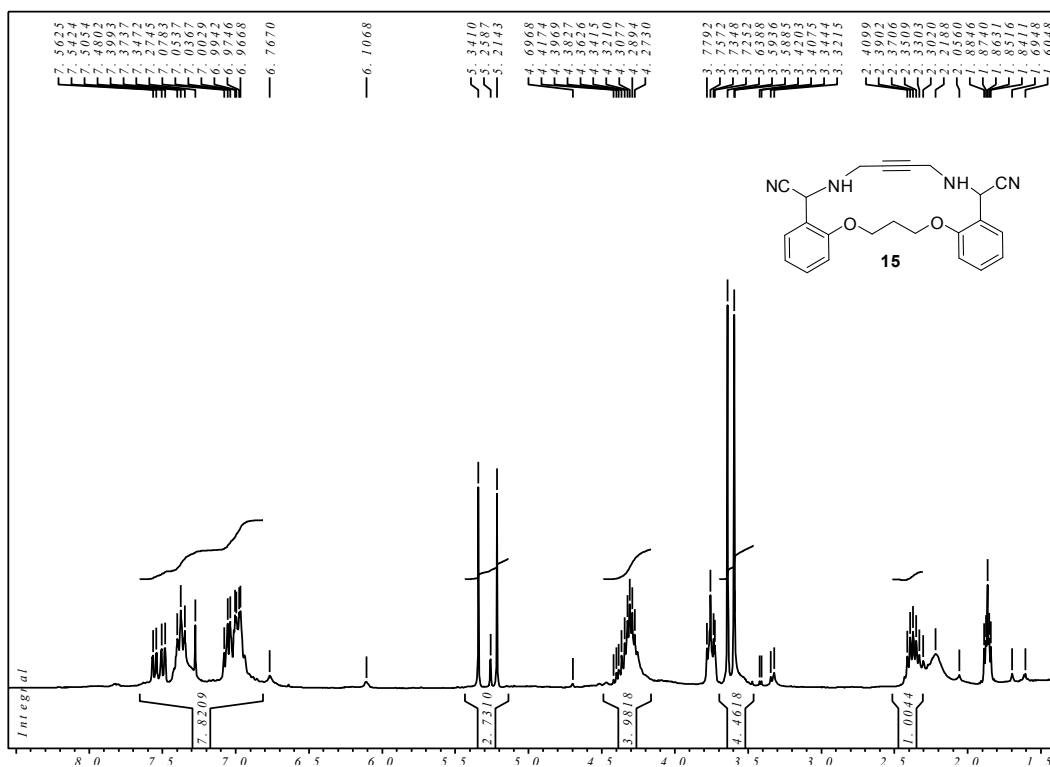

### <sup>13</sup>C-NMR OF COMPOUND 15

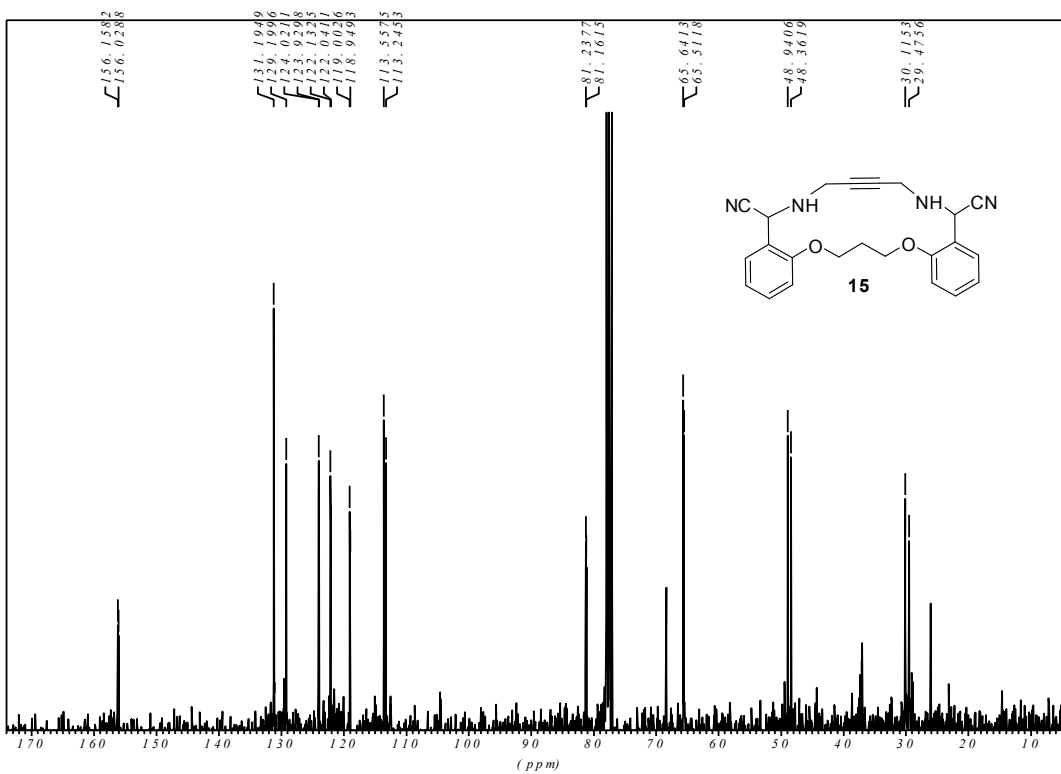

### <sup>1</sup>H-NMR OF COMPOUND 16

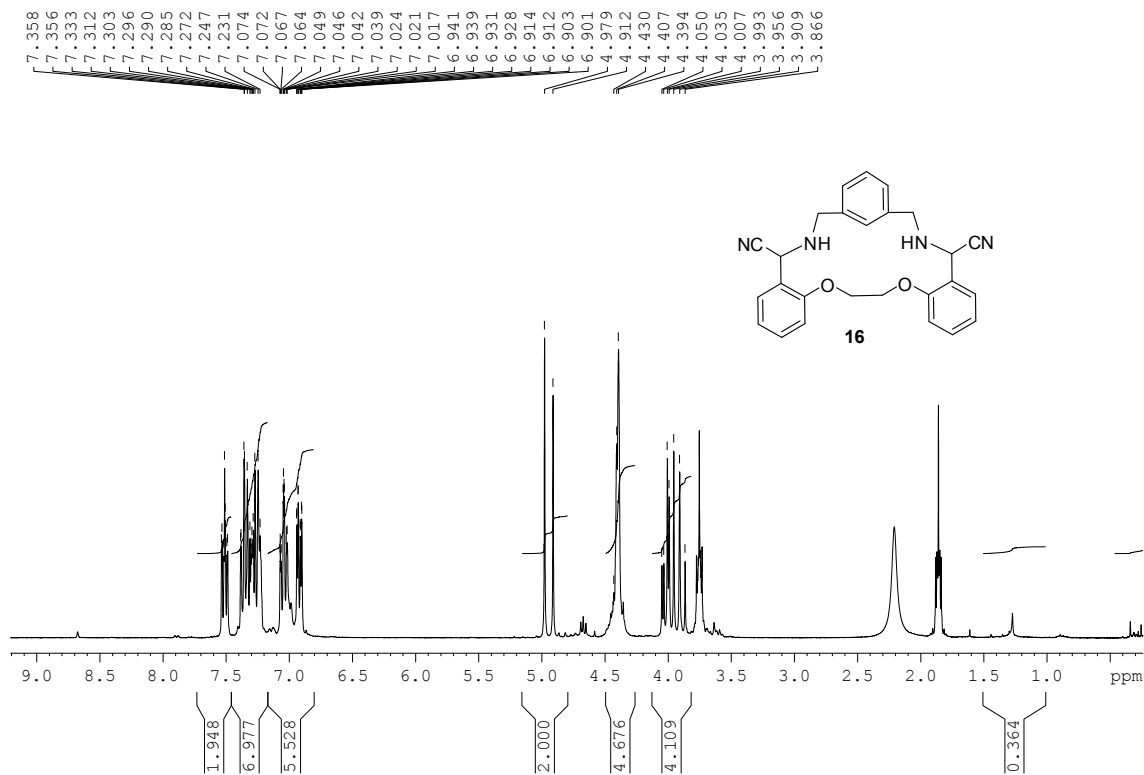

### <sup>13</sup>C-NMR OF COMPOUND 16

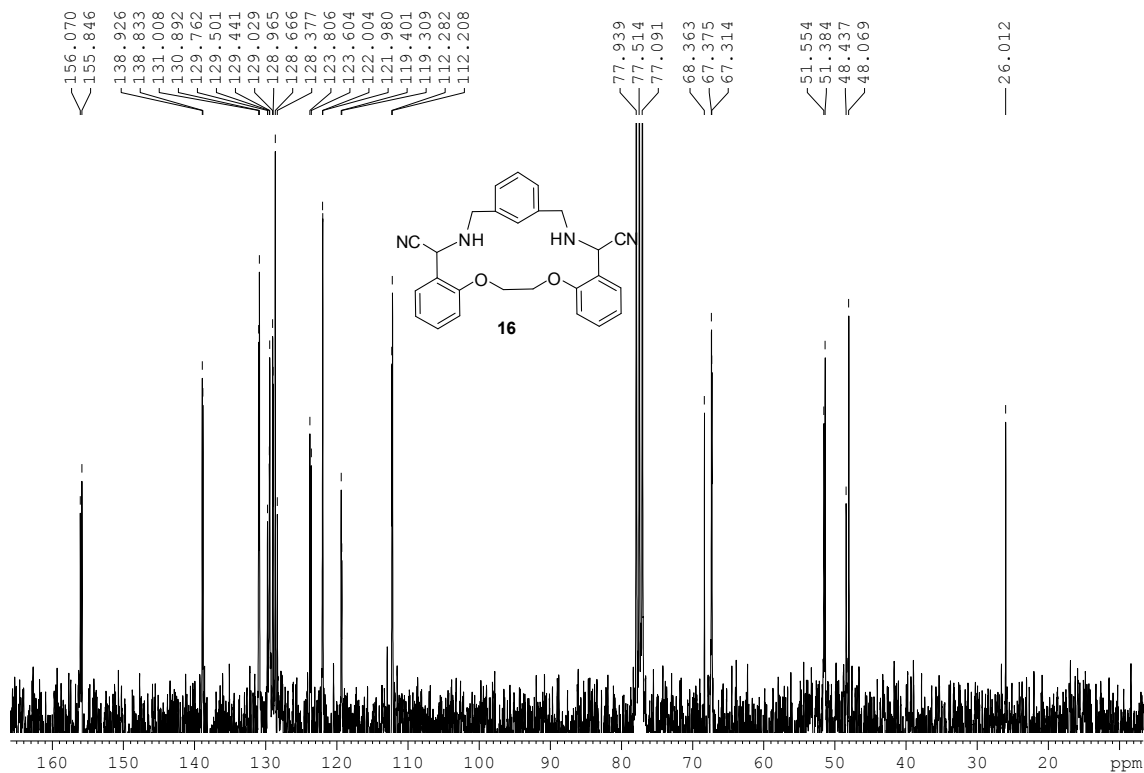

### <sup>1</sup>H-NMR OF COMPOUND **8a**

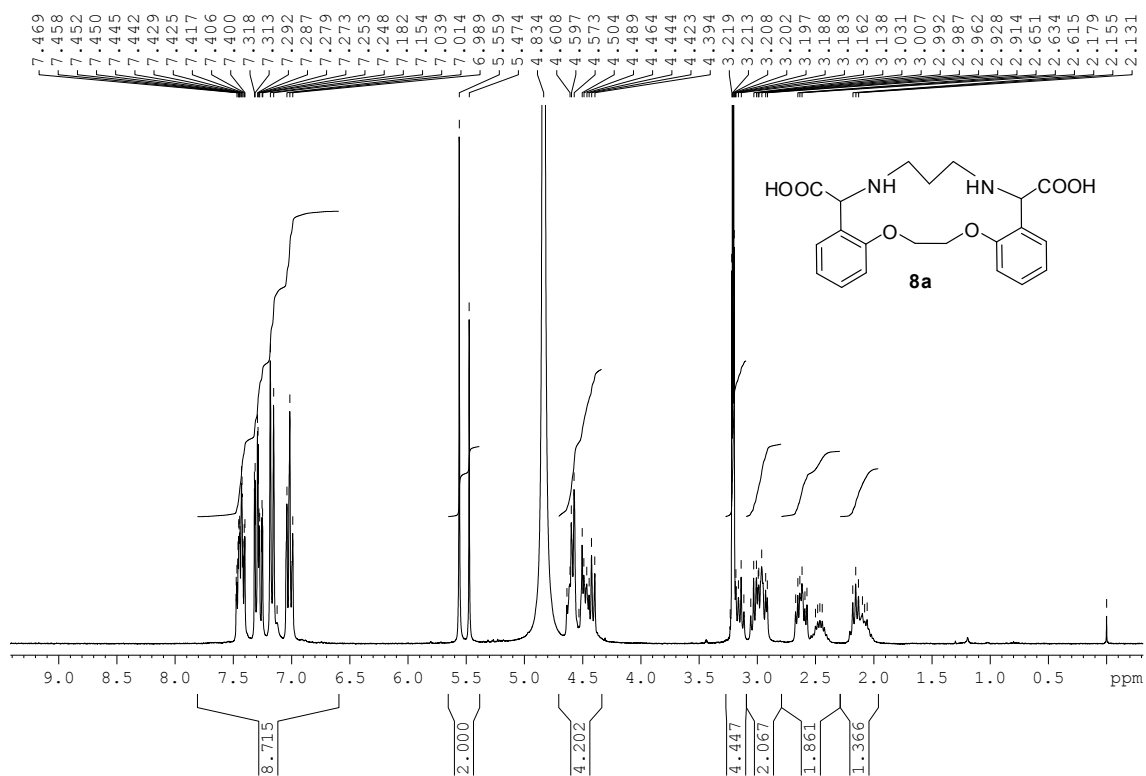

### <sup>13</sup>C-NMR OF COMPOUND **8a**

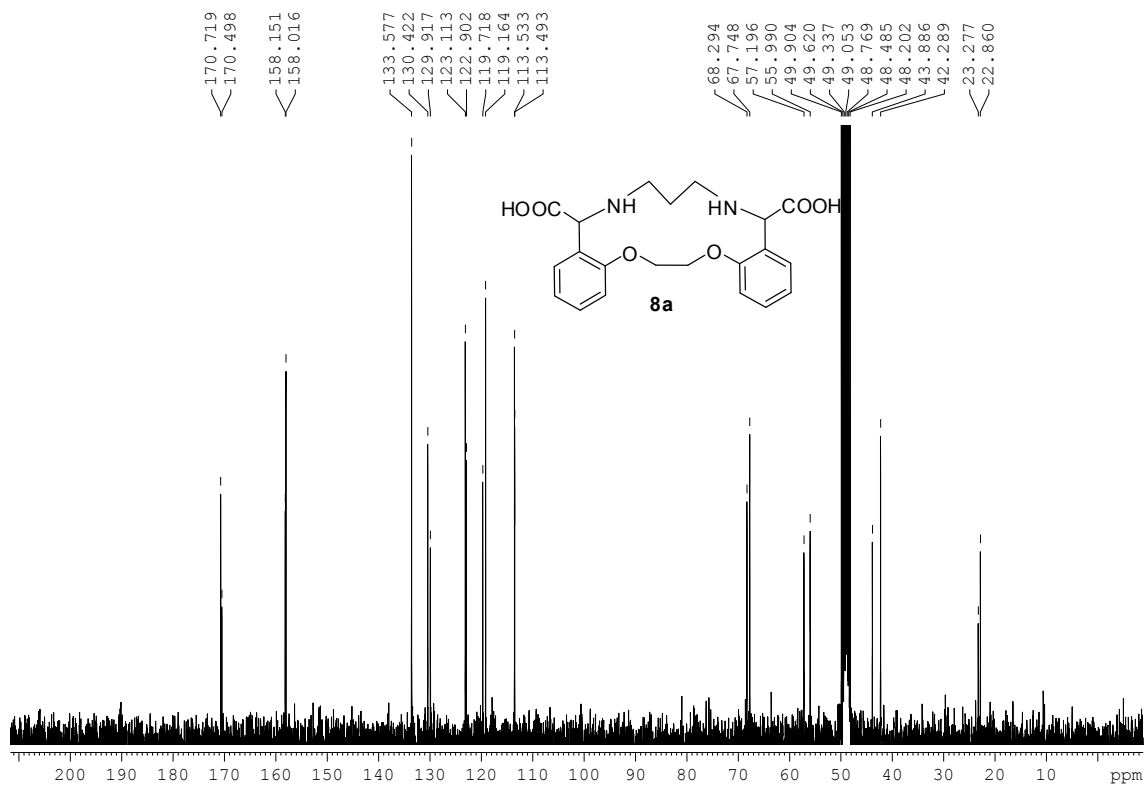

### <sup>1</sup>H-NMR OF COMPOUND **8b**

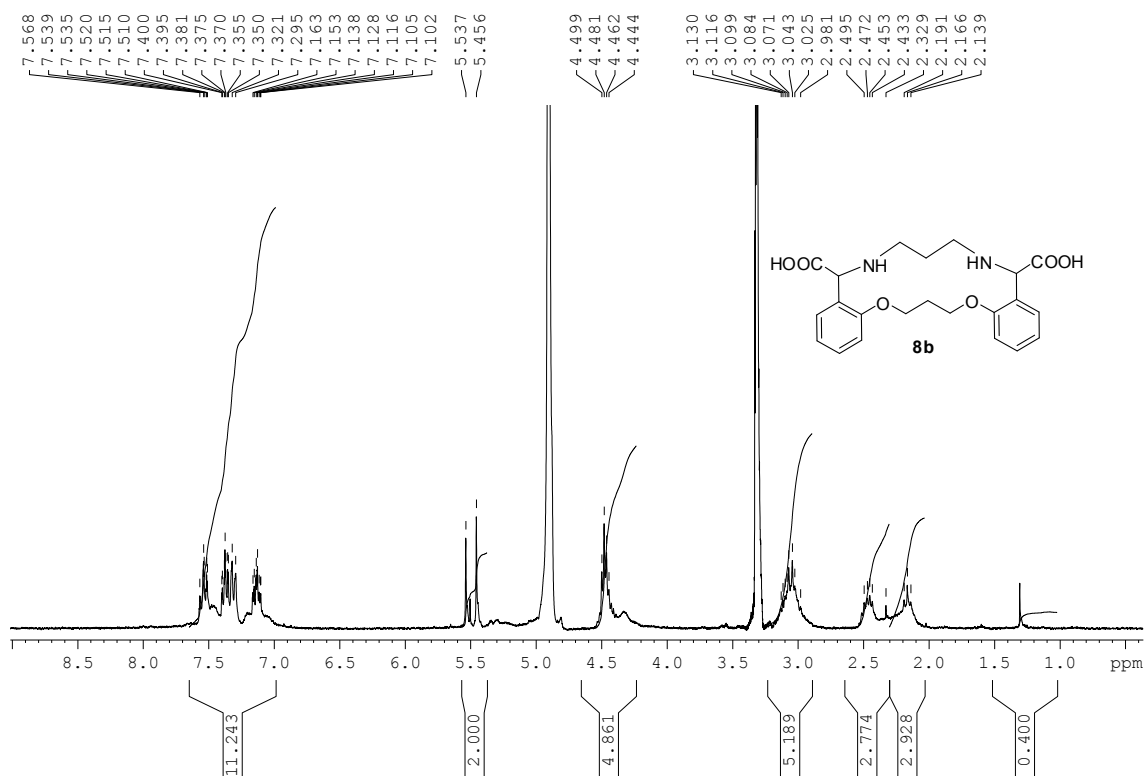

### <sup>13</sup>C-NMR OF COMPOUND **8b**

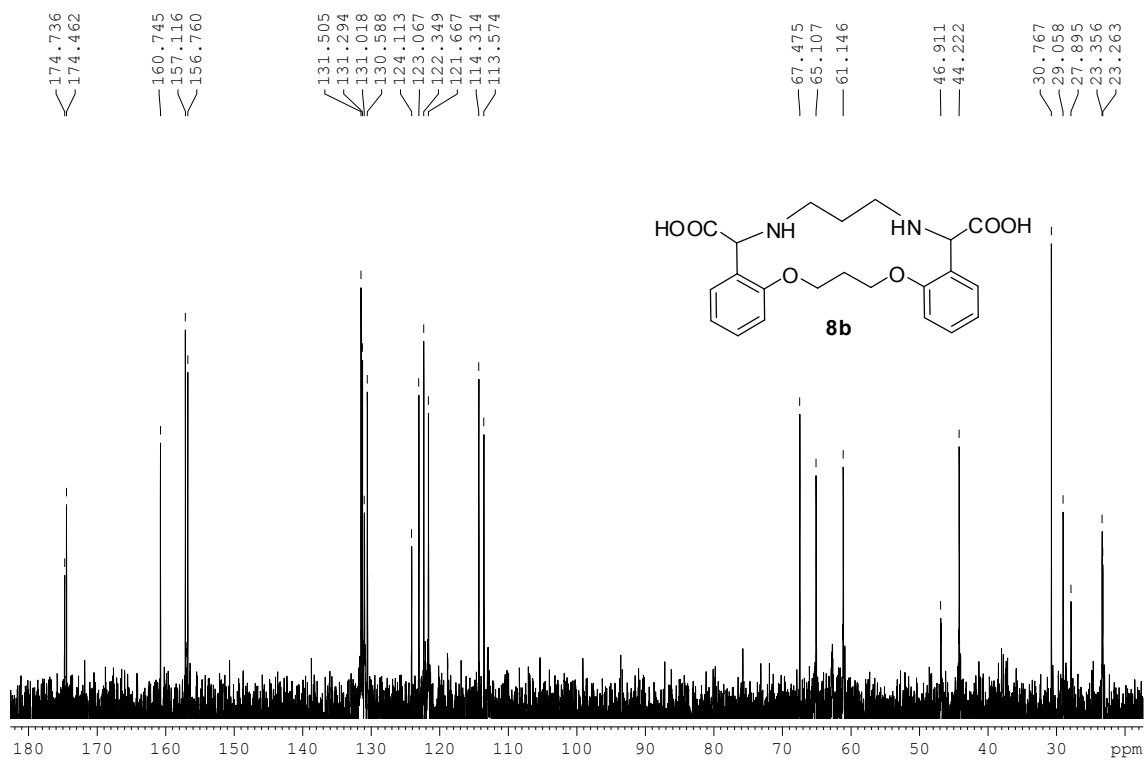



### <sup>1</sup>H-NMR OF COMPOUND **8c**

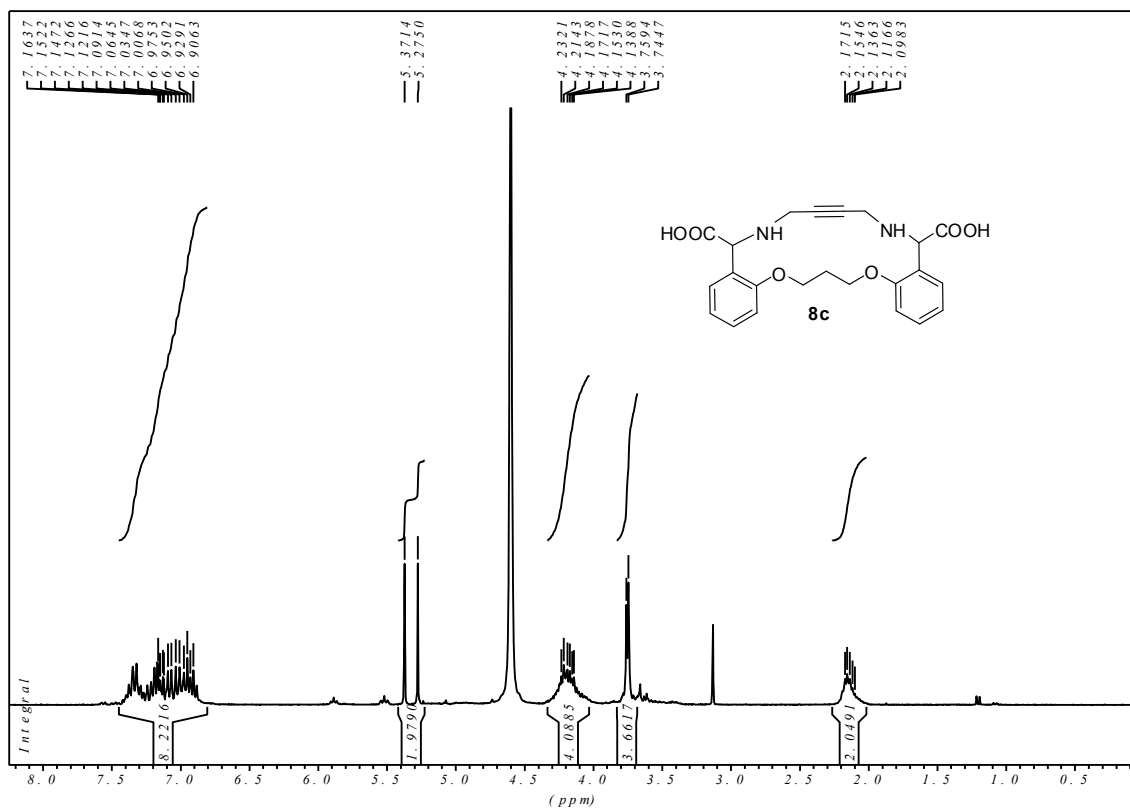

### <sup>13</sup>C-NMR OF COMPOUND **8c**

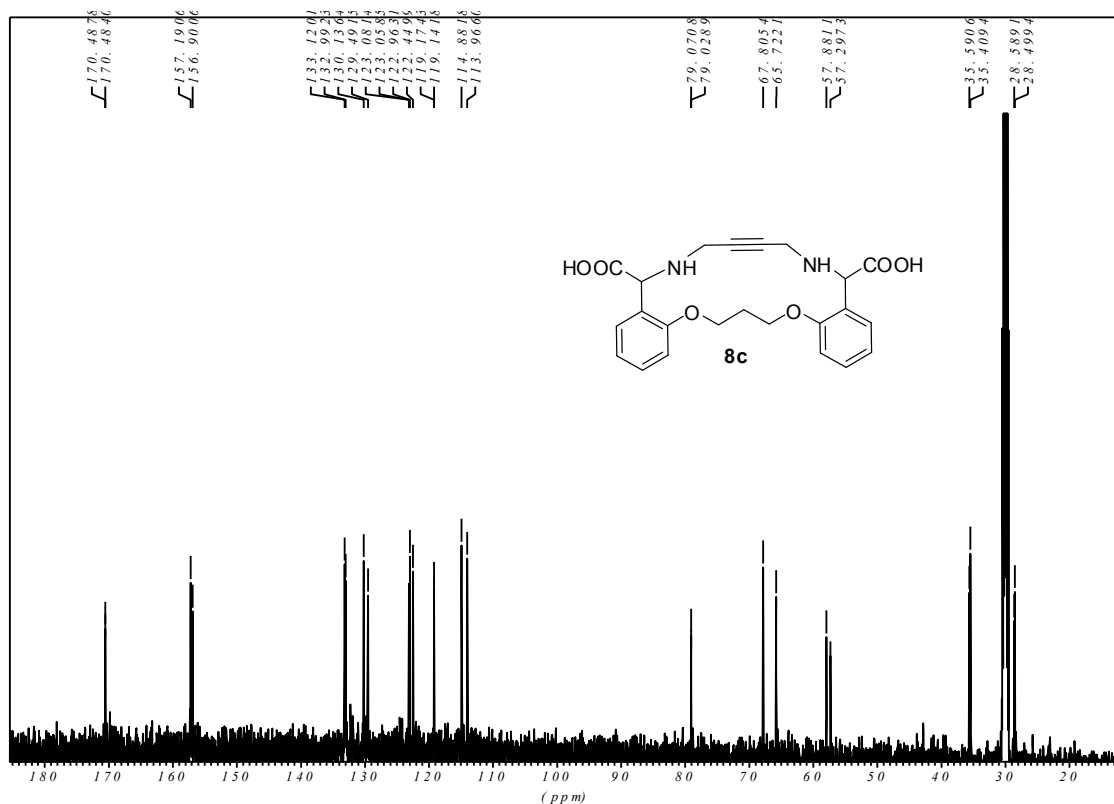

### <sup>1</sup>H-NMR OF COMPOUND **8d**

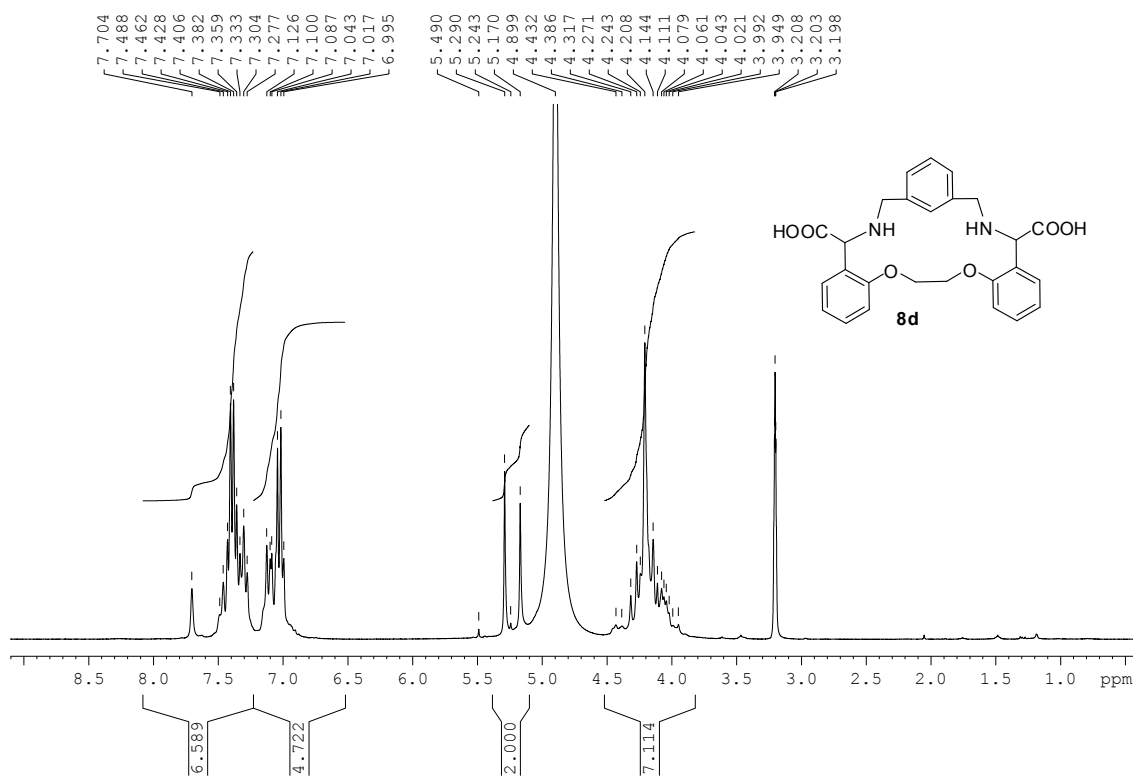

### <sup>13</sup>C-NMR OF COMPOUND **8d**

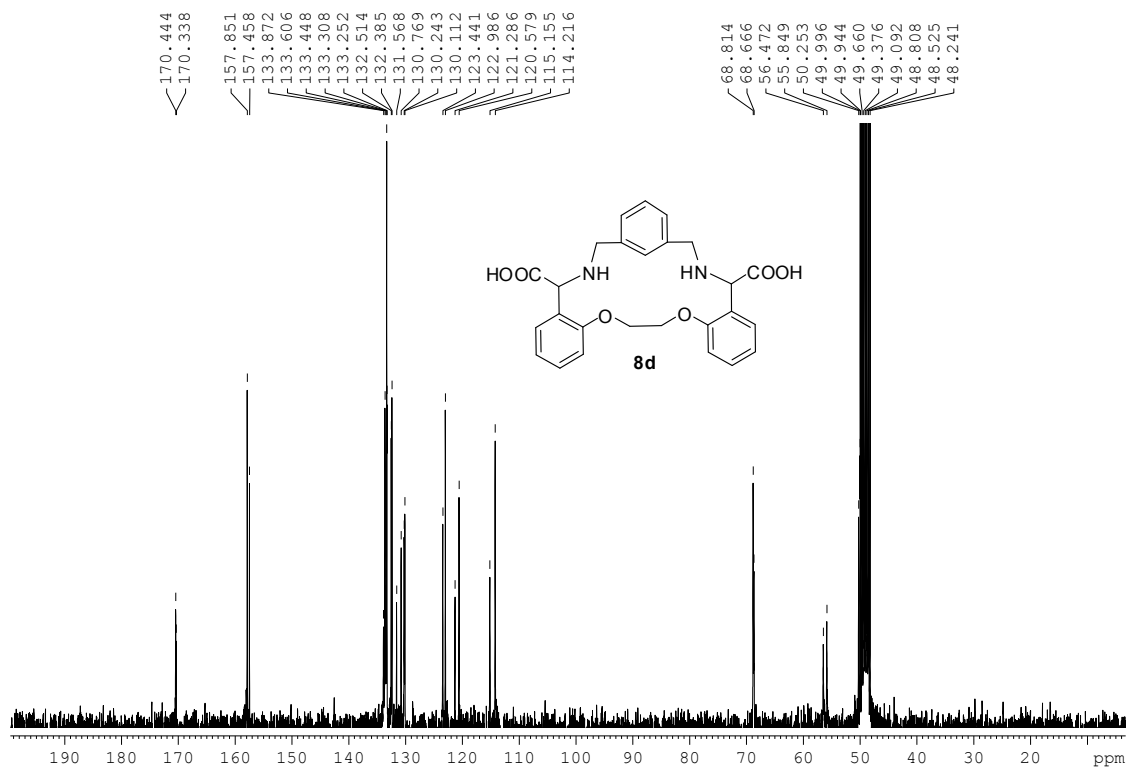

### <sup>1</sup>H-NMR OF COMPOUND Zn-8a

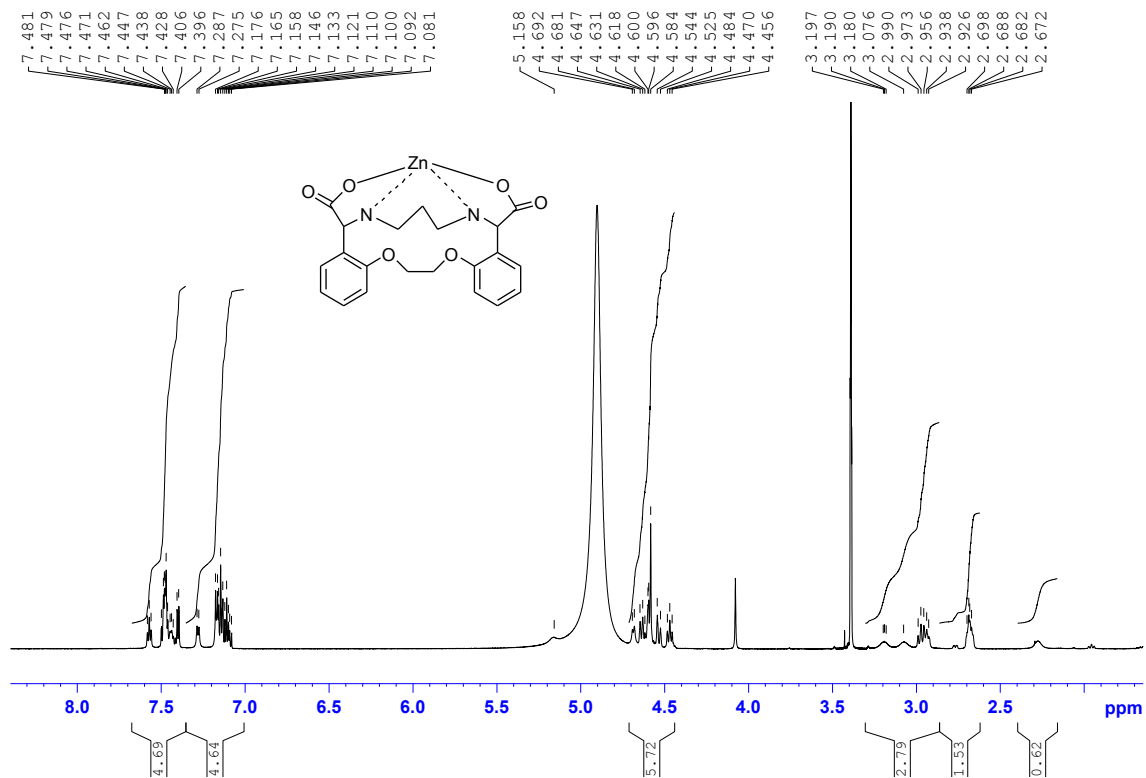

### <sup>13</sup>C-NMR OF COMPOUND Zn-8a

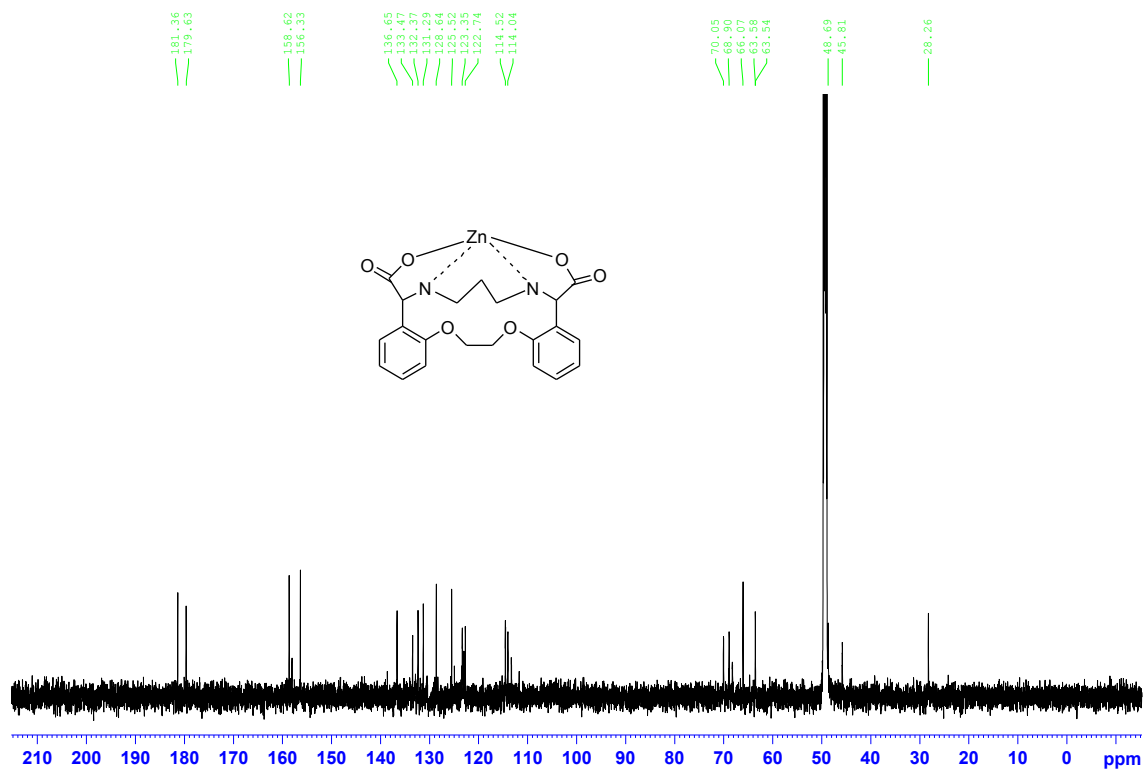

### $^1\text{H-NMR}$ OF COMPOUND Zn-8b

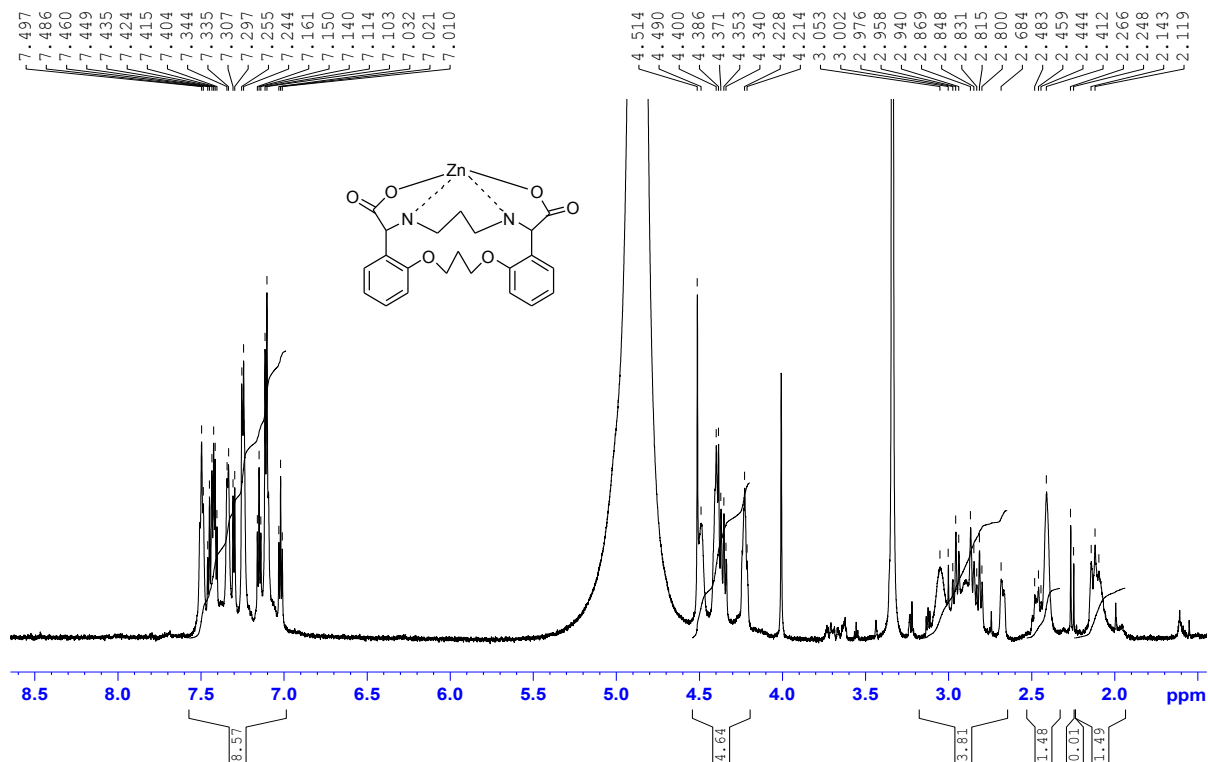

### $^{13}\text{C-NMR}$ OF COMPOUND Zn-8b

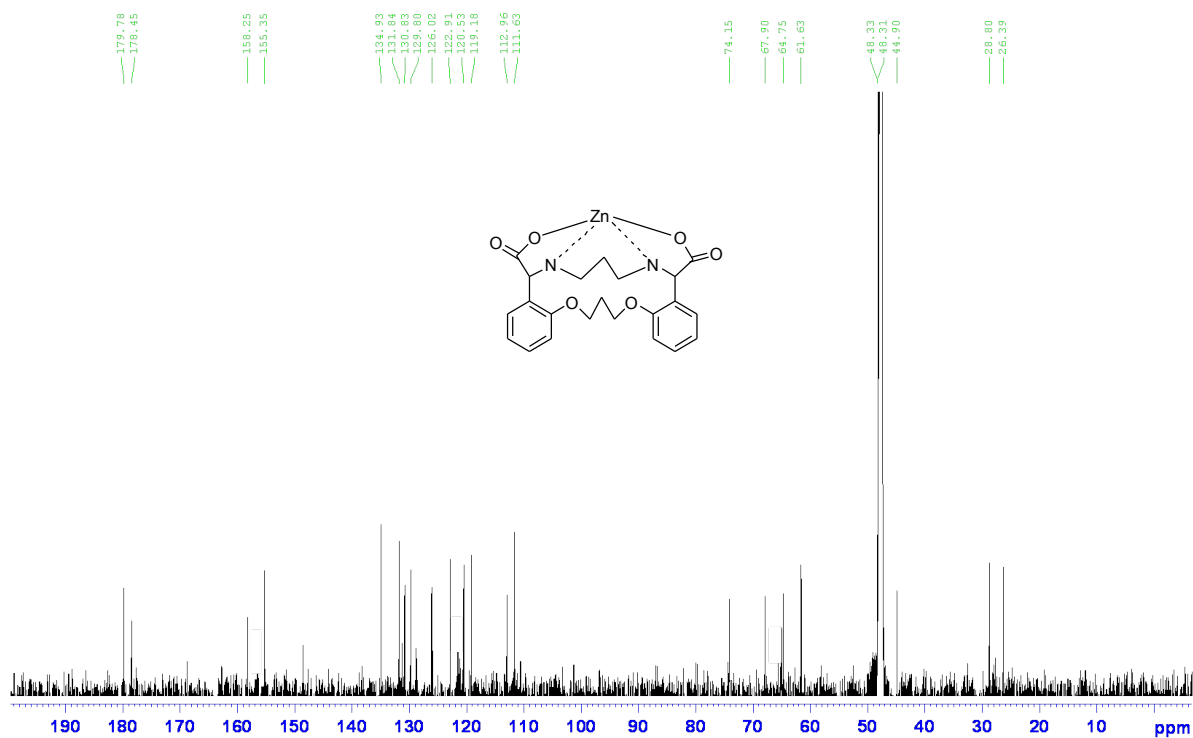

Supplement: c1dt10539f.pdf [file c1dt10539f.pdf]
